# Supplementary material for: Letter to the editor on “Asymptomatic intraprosthetic dual mobility cup dislocation with increased metal ion levels”
Source: PubMed Central journal article supplement — Arthroplast Today. 2020 Feb 21;6(1):132–3. doi: 10.1016/j.artd.2020.01.002 (PMC7083734; doi:10.1016/j.artd.2020.01.002), 2020-02-21
Supplement: mmc1.pdf [file mmc1.pdf]

# CONFLICT OF INTEREST STATEMENT

## *American Association of Hip and Knee Surgeons*

(Adopted from the American Academy of Orthopaedic Surgeons disclosure statement)

The following form **must be filled out completely and submitted by each author (example, 6 authors, 6 forms).**  
**All items require a response. If there is no relevant disclosure for a given item, enter "None."**

LETTER TO THE EDITOR ON "ASYMPTOMATIC INTRAPROSTHETIC DUAL MOBILITY BOP DISLOCATION WITH  
Manuscript Title INCREASED METAL ION LEVELS"

1. Royalties from a company or supplier (The following conflicts were disclosed) *No*
2. Speakers bureau/paid presentations for a company or supplier (The following conflicts were disclosed) *No*
- 3A. Paid employee for a company or supplier (The following conflicts were disclosed) *No*
- 3B. Paid consultant for a company or supplier (The following conflicts were disclosed) *No*
- 3C. Unpaid consultants for a company or supplier (The following conflicts were disclosed) *No*
4. Stock or stock options in a company or supplier (The following conflicts were disclosed) *No*
5. Research support from a company or supplier as a Principal Investigator (The following conflicts were disclosed) *NC*
6. Other financial or material support from a company or supplier (The following conflicts were disclosed) *No*
7. Royalties, financial or material support from publishers (The following conflicts were disclosed) *No*
8. Medical/Orthopaedic publications editorial/governing board (The following conflicts were disclosed) *No*
9. Board member/committee appointments for a society (The following conflicts were disclosed) *No*

**Each author must sign AND print or type his/her name, date and submit a separate form**

In addition, one BLINDED Conflict of Interest form (no author names used) should be submitted per manuscript with all author disclosures.

*DOMENICO TIGANI*

Author Name (Print or Type)

*Domenico Tigani*

Author Signature

*10-28-2019*

Date

## CONFLICT OF INTEREST STATEMENT

### *American Association of Hip and Knee Surgeons*

(Adopted from the American Academy of Orthopaedic Surgeons disclosure statement)

The following form **must be filled out completely and submitted by each author (example, 6 authors, 6 forms).**  
**All items require a response. If there is no relevant disclosure for a given item, enter "None."**

---

Manuscript Title: Letter to the editor on "Asymptomatic intraprosthetic dual mobility cup dislocation with increased metal ion levels".

1. Royalties from a company or supplier (The following conflicts were disclosed)  
None
2. Speakers bureau/paid presentations for a company or supplier (The following conflicts were disclosed)  
None
- 3A. Paid employee for a company or supplier (The following conflicts were disclosed)  
None
- 3B. Paid consultant for a company or supplier (The following conflicts were disclosed)  
None
- 3C. Unpaid consultants for a company or supplier (The following conflicts were disclosed)  
None
4. Stock or stock options in a company or supplier (The following conflicts were disclosed)  
None
5. Research support from a company or supplier as a Principal Investigator (The following conflicts were disclosed)  
None
6. Other financial or material support from a company or supplier (The following conflicts were disclosed)  
None
7. Royalties, financial or material support from publishers (The following conflicts were disclosed)  
None
8. Medical/Orthopaedic publications editorial/governing board (The following conflicts were disclosed)  
None
9. Board member/committee appointments for a society (The following conflicts were disclosed)  
None

**Each author must sign AND print or type his/her name, date and submit a separate form**

In addition, one BLINDED Conflict of Interest form (no author names used) should be submitted per manuscript with all author disclosures.

Luca Amendola



30-10-2019

---

Author Name (Print or Type)

Author Signature

Date

# CONFLICT OF INTEREST STATEMENT

## *American Association of Hip and Knee Surgeons*

(Adopted from the American Academy of Orthopaedic Surgeons disclosure statement)

The following form **must be filled out completely and submitted by each author (example, 6 authors, 6 forms).**  
**All items require a response. If there is no relevant disclosure for a given item, enter "None."**

Paolo Barca LETTER TO THE EDITOR ON "ASYMPTOMATIC INTRAPROSTHETIC DUAL MOBILITY CUP  
Manuscript Title DISLOCATION WITH INCREASED METAL ION LEVELS "

1. Royalties from a company or supplier (The following conflicts were disclosed) / none
2. Speakers bureau/paid presentations for a company or supplier (The following conflicts were disclosed) / none
- 3A. Paid employee for a company or supplier (The following conflicts were disclosed) / none
- 3B. Paid consultant for a company or supplier (The following conflicts were disclosed) / none
- 3C. Unpaid consultants for a company or supplier (The following conflicts were disclosed) / none
4. Stock or stock options in a company or supplier (The following conflicts were disclosed) / none
5. Research support from a company or supplier as a Principal Investigator (The following conflicts were disclosed) / none
6. Other financial or material support from a company or supplier (The following conflicts were disclosed) / none
7. Royalties, financial or material support from publishers (The following conflicts were disclosed) / none
8. Medical/Orthopaedic publications editorial/governing board (The following conflicts were disclosed) / none
9. Board member/committee appointments for a society (The following conflicts were disclosed) / none

**Each author must sign AND print or type his/her name, date and submit a separate form**

In addition, one BLINDED Conflict of Interest form (no author names used) should be submitted per manuscript with all author disclosures.

Paolo Barca  
Author Name (Print or Type)

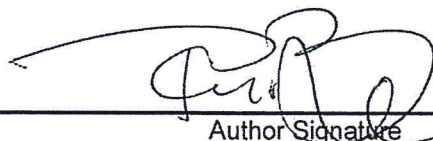

Author Signature

28/10/2019

Date



# CONFLICT OF INTEREST STATEMENT

## *American Association of Hip and Knee Surgeons*

(Adopted from the American Academy of Orthopaedic Surgeons disclosure statement)

The following form **must be filled out completely and submitted by each author (example, 6 authors, 6 forms). All items require a response. If there is no relevant disclosure for a given item, enter "None."**

Manuscript Title

**Letter to the editor on "Asymptomatic intraprostatic dual mobility cup dislocation with increased metal ion levels"**

1. Royalties from a company or supplier (The following conflicts were disclosed) None
2. Speakers bureau/paid presentations for a company or supplier (The following conflicts were disclosed) None
- 3A. Paid employee for a company or supplier (The following conflicts were disclosed) None
- 3B. Paid consultant for a company or supplier (The following conflicts were disclosed) None
- 3C. Unpaid consultants for a company or supplier (The following conflicts were disclosed) None
4. Stock or stock options in a company or supplier (The following conflicts were disclosed) None
5. Research support from a company or supplier as a Principal Investigator (The following conflicts were disclosed) None
6. Other financial or material support from a company or supplier (The following conflicts were disclosed) None
7. Royalties, financial or material support from publishers (The following conflicts were disclosed) None
8. Medical/Orthopaedic publications editorial/governing board (The following conflicts were disclosed) None
9. Board member/committee appointments for a society (The following conflicts were disclosed) None

**Each author must sign AND print or type his/her name, date and submit a separate form**

In addition, one BLINDED Conflict of Interest form (no author names used) should be submitted per manuscript with all author disclosures.

EMANUELA CASTIELLO



28/10/2019

Author Name (Print or Type)

Author Signature

Date

## CONFLICT OF INTEREST STATEMENT

American Association of Hip and Knee Surgeons  
(Adapted from the American Academy of Orthopaedic Surgeons disclosure statement)

The following form must be filled out completely and submitted by each author (example of authors, 0 forms).  
All items require a response. If there is no relevant disclosure for a given item, enter "None."

LETTER TO THE EDITOR ON "ASYMPTOMATIC INTRAPROSTHETIC DUAL MOBILITY UHP DISLOCATION  
WITH INCREASED METAL ION LEVELS"

Manuscript Title

1. Royalties from a company or supplier (The following conflicts were disclosed)

Group Lepine France

2. Speakers bureau/paid presentations for a company or supplier (The following conflicts were disclosed)

Group Lepine France

3A. Paid employee for a company or supplier (The following conflicts were disclosed)

None

3B. Paid consultant for a company or supplier (The following conflicts were disclosed)

Group Lepine France

3C. Unpaid consultants for a company or supplier (The following conflicts were disclosed)

None

4. Stock or stock options in a company or supplier (The following conflicts were disclosed)

None

5. Research support from a company or supplier as a Principal Investigator (The following conflicts were disclosed)

None

6. Other financial or material support from a company or supplier (The following conflicts were disclosed)

None

7. Royalties, financial or material support from publishers (The following conflicts were disclosed)

None

8. Medical/Orthopaedic publications editorial/governing board (The following conflicts were disclosed)

None

9. Board member/committee appointments for a society (The following conflicts were disclosed)

None

**Each author must sign AND print or type his/her name, date and submit a separate form**

In addition, one BLINDED Conflict of Interest form (no author names used) should be submitted per manuscript with all author disclosures.

Author Name (Print or Type)

Caton JH Author Signature



Date 28 Nov 2019



# CONFLICT OF INTEREST STATEMENT

## *American Association of Hip and Knee Surgeons*

(Adopted from the American Academy of Orthopaedic Surgeons disclosure statement)

The following form **must be filled out completely and submitted by each author (example, 6 authors, 6 forms).**  
**All items require a response. If there is no relevant disclosure for a given item, enter "None."**

Manuscript Title ***Letter to the editor on "Asymptomatic intraprosthetic dual mobility cup dislocation with increased metal ion levels"***

---

1. Royalties from a company or supplier (The following conflicts were disclosed)  
Royalties from groupe lepine  
Royalties from Dediene
2. Speakers bureau/paid presentations for a company or supplier (The following conflicts were disclosed)  
Groupe lepine
- 3A. Paid employee for a company or supplier (The following conflicts were disclosed)  
No
- 3B. Paid consultant for a company or supplier (The following conflicts were disclosed)  
Groupe lepine
- 3C. Unpaid consultants for a company or supplier (The following conflicts were disclosed)  
none
4. Stock or stock options in a company or supplier (The following conflicts were disclosed)  
none
5. Research support from a company or supplier as a Principal Investigator (The following conflicts were disclosed)  
none
6. Other financial or material support from a company or supplier (The following conflicts were disclosed)  
none
7. Royalties, financial or material support from publishers (The following conflicts were disclosed)  
none
8. Medical/Orthopaedic publications editorial/governing board (The following conflicts were disclosed)  
none
9. Board member/committee appointments for a society (The following conflicts were disclosed)  
None

**Each author must sign AND print or type his/her name, date and submit a separate form**

In addition, one BLINDED Conflict of Interest form (no author names used) should be submitted per manuscript with all author disclosures.

---

Author Name (Print or Type)

JEAN LOUIS PRUDHON

Author Signature



Date

26/10/2019

## CONFLICT OF INTEREST STATEMENT

### *American Association of Hip and Knee Surgeons*

(Adopted from the American Academy of Orthopaedic Surgeons disclosure statement)

The following form **must be filled out completely and submitted by each author (example, 6 authors, 6 forms).**  
**All items require a response. If there is no relevant disclosure for a given item, enter "None."**

LETTER TO THE EDITOR ON "ASYMPTOMATIC INTRAPROSTHETIC DUAL MOBILITY BOP DISLOCATION WITH  
Manuscript Title INCREASED METAL ION LEVELS"

1. Royalties from a company or supplier (The following conflicts were disclosed)  
No
2. Speakers bureau/paid presentations for a company or supplier (The following conflicts were disclosed)  
Serf, In2bones
- 3A. Paid employee for a company or supplier (The following conflicts were disclosed)  
no
- 3B. Paid consultant for a company or supplier (The following conflicts were disclosed)  
Serf, Aston
- 3C. Unpaid consultants for a company or supplier (The following conflicts were disclosed)  
no
4. Stock or stock options in a company or supplier (The following conflicts were disclosed)  
no
5. Research support from a company or supplier as a Principal Investigator (The following conflicts were disclosed)  
no
6. Other financial or material support from a company or supplier (The following conflicts were disclosed)  
no
7. Royalties, financial or material support from publishers (The following conflicts were disclosed)  
no
8. Medical/Orthopaedic publications editorial/governing board (The following conflicts were disclosed)  
no
9. Board member/committee appointments for a society (The following conflicts were disclosed)  
no

**Each author must sign AND print or type his/her name, date and submit a separate form**

In addition, one BLINDED Conflict of Interest form (no author names used) should be submitted per manuscript with all author disclosures.

Author Name (Print or Type)  
dr Thomas NERI

Author Signature 

Date  
27 october 2019
